# Supplementary material for: Sandalwood seed oil improves insulin sensitivity in high-fat/high-sucrose diet-fed rats associated with altered intestinal microbiota and its metabolites
Source: Royal Society of Chemistry journal article supplement (doi:10.1039/d1fo02239c), 2021-01-01
Supplement: d1fo02239c1.pdf [file d1fo02239c1.pdf]

## Supplemental Tables

**Supplemental Table 1** Spearman correlation between serum percentage of specific fatty acids in the experimental groups with IR-related parameters.

|               | BWG      | WAT      | FBG      | FINS    | HOMA<br>-IR | IL-1 $\beta$ | IL-6    | TNF- $\alpha$ | FFA      |
|---------------|----------|----------|----------|---------|-------------|--------------|---------|---------------|----------|
| <b>Phylum</b> |          |          |          |         |             |              |         |               |          |
| C16:0         | 0.364*   | -0.097   | 0.115    | 0.450*  | 0.489*      | 0.377*       | 0.481*  | 0.337*        | 0.377*   |
| C18:0         | 0.417**  | 0.471**  | 0.466*   | 0.146   | 0.474**     | 0.680**      | 0.670** | 0.642**       | 0.631**  |
| C18:1n-9      | 0.026    | -0.120   | -0.034   | -0.060  | -0.072      | 0.217        | 0.240   | 0.157         | 0.007    |
| C18:2n-6      | 0.543**  | 0.501*   | 0.509*   | 0.359*  | 0.585**     | 0.620**      | 0.565** | 0.470**       | 0.525**  |
| C18:3n-3      | -0.510** | -0.203   | -0.248*  | -0.485* | -0.543**    | -            | -       | -             | -0.404** |
|               |          |          |          |         |             | 0.465**      | 0.402** | 0.470**       |          |
| C20:5n-3      | -0.330   | -0.428** | -0.466** | -0.027  | -0.368**    | -0.467*      | -0.343* | -             | -0.377*  |
|               |          |          |          |         |             |              |         | 0.530**       |          |
| C22:6n-3      | -0.513** | -0.567** | -0.531** | -       | -0.459**    | -0.545*      | -       | -             | -0.642** |
|               |          |          |          | 0.478** |             |              | 0.481** | 0.528**       |          |
| XMYA          | -        | -        | -        | -       | -           | -            | -       | -             | -        |

Note: The data shows the Spearman correlation coefficient between the levels of gut microbiota with IR-related parameters. \*  $p < 0.05$ , \*\*  $p < 0.01$
